# Supplementary material for: Cucumis sativus L. Seeds Ameliorate Muscular Spasm-Induced Gastrointestinal and Respiratory Disorders by Simultaneously Inhibiting Calcium Mediated Signaling Pathway
Source: MDPI journal article supplement (doi:10.3390/ph14111197), 2021-11-22
Supplement: s1 [file s1]

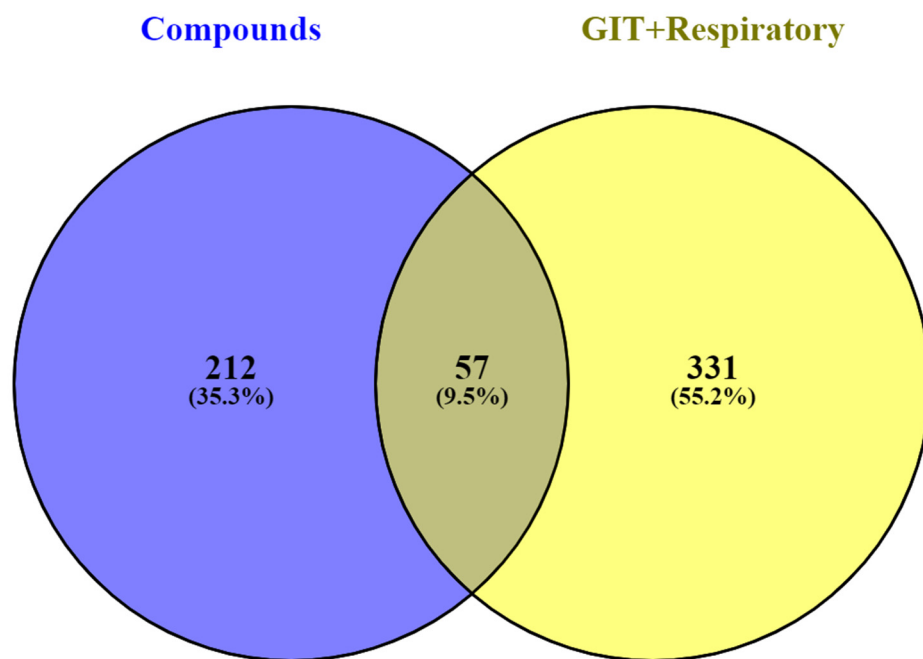

**Figure S1.** Venn Diagram between pathogenic genes and compounds.

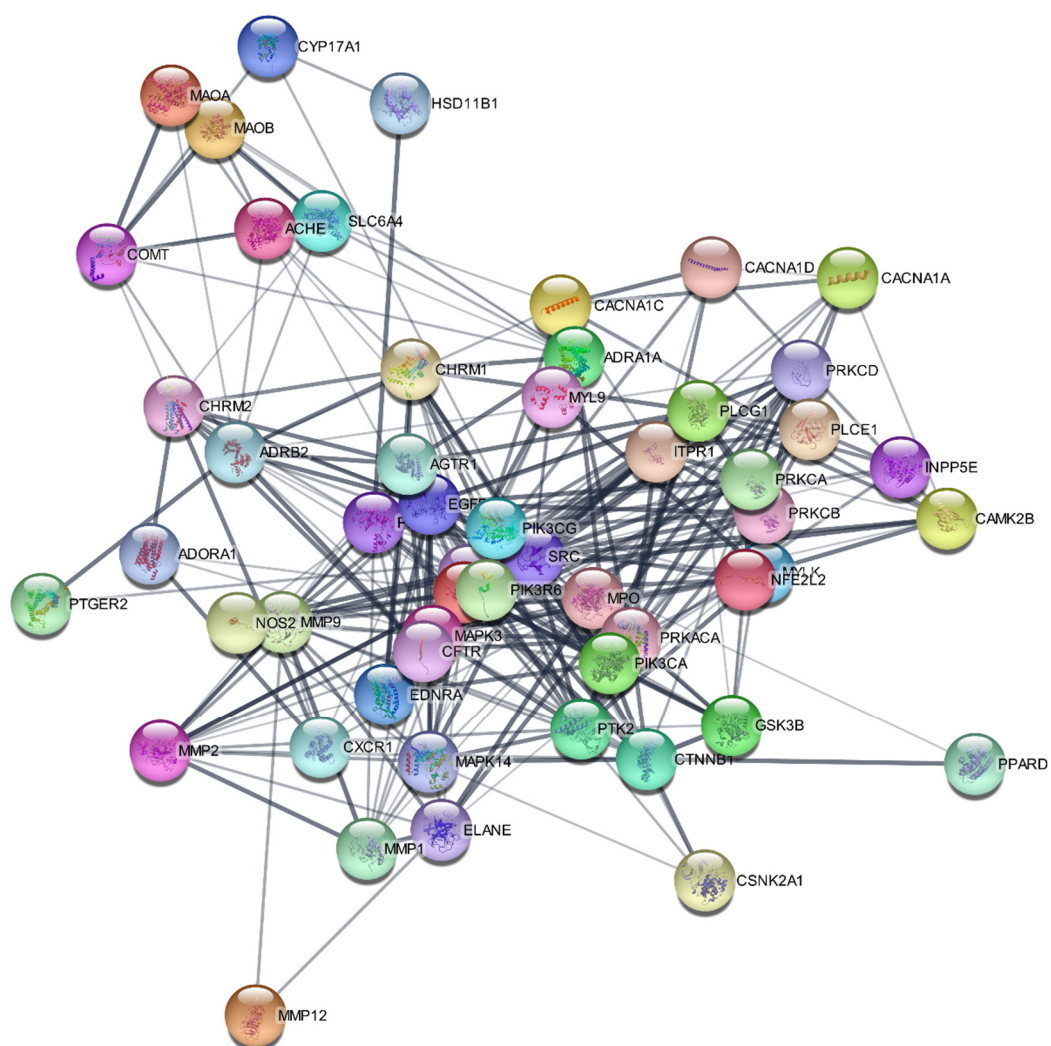

**Table S1.** Precision validation of analytical method

| Analytes                  | Theoretical concentration ( $\mu\text{g ml}^{-1}$ ) | Inter-day precision ( $n = 5$ )                  |       | Intra-day precision ( $n=5$ )                    |       |
|---------------------------|-----------------------------------------------------|--------------------------------------------------|-------|--------------------------------------------------|-------|
|                           |                                                     | Measured concentration ( $\mu\text{g ml}^{-1}$ ) | RSD % | Measured concentration ( $\mu\text{g ml}^{-1}$ ) | RSD % |
| Stigmasterol              | 100                                                 | 99.28 $\pm$ 1.10                                 | 1.11  | 99.45 $\pm$ 1.66                                 | 1.67  |
| $\beta$ -sitosterol       | 100                                                 | 99.67 $\pm$ 0.44                                 | 0.44  | 99.36 $\pm$ 0.68                                 | 0.68  |
| Scopoletin                | 100                                                 | 99.51 $\pm$ 0.96                                 | 0.97  | 99.02 $\pm$ 1.58                                 | 1.60  |
| 1,4-Dicaffeoylquinic acid | 100                                                 | 99.29 $\pm$ 0.99                                 | 0.99  | 99.47 $\pm$ 1.20                                 | 1.20  |
| Luteolin                  | 100                                                 | 99.69 $\pm$ 0.99                                 | 0.99  | 99.30 $\pm$ 0.39                                 | 0.40  |
| Kaempferol                | 100                                                 | 99.45 $\pm$ 1.66                                 | 1.67  | 98.57 $\pm$ 1.40                                 | 1.42  |
| Ferulic acid              | 100                                                 | 99.06 $\pm$ 0.71                                 | 0.71  | 99.05 $\pm$ 1.42                                 | 1.44  |
| Epicatechin               | 100                                                 | 99.31 $\pm$ 1.32                                 | 1.33  | 98.77 $\pm$ 1.37                                 | 1.39  |
| Ellagic acid              | 100                                                 | 99.16 $\pm$ 1.27                                 | 1.29  | 99.08 $\pm$ 0.91                                 | 0.92  |
| Kaempferol-3-O-glucoside  | 100                                                 | 99.48 $\pm$ 0.48                                 | 0.48  | 98.96 $\pm$ 1.27                                 | 1.28  |
| Quercetin                 | 100                                                 | 98.69 $\pm$ 1.72                                 | 1.75  | 99.40 $\pm$ 1.12                                 | 1.13  |
| Apigenin                  | 100                                                 | 99.42 $\pm$ 0.73                                 | 0.73  | 99.42 $\pm$ 0.88                                 | 0.89  |

All values are mean  $\pm$  S.D. taken as triplicates. All values are mean  $\pm$  S.D. triplicate analyses for 3 days. Percent coefficient of variation (% RSD); (SD/Mean)  $\times$ 100.

**Table S2.** Accuracy validation of analytical method of the *C. sativus* extract through the percent recovery method.

| Analytes                  | Standard additions<br>µg/ml | % Recovery |        |        | Mean± SD     | RSD% |
|---------------------------|-----------------------------|------------|--------|--------|--------------|------|
|                           |                             | Day 1      | Day 2  | Day 3  |              |      |
| Stigmasterol              | 50.00                       | 49.99      | 49.00  | 49.00  | 48.50± 1.27  | 2.62 |
|                           | 100.00                      | 100.00     | 97.65  | 99.00  | 98.93± 0.92  | 0.93 |
|                           | 200.00                      | 200.00     | 199.00 | 197.00 | 198.22± 1.30 | 0.66 |
| β-sitosterol              | 50.00                       | 49.00      | 49.50  | 50.60  | 49.64± 0.70  | 1.41 |
|                           | 100.00                      | 101.00     | 98.45  | 99.55  | 99.62± 0.99  | 0.99 |
|                           | 200.00                      | 197.60     | 197.00 | 198.10 | 197.56± 0.55 | 0.28 |
| Scopoletin                | 50.00                       | 49.00      | 49.00  | 50.10  | 49.84± 0.88  | 1.76 |
|                           | 100.00                      | 98.00      | 99.00  | 100.10 | 99.64± 1.18  | 1.18 |
|                           | 200.00                      | 197.00     | 197.00 | 198.10 | 198.64± 1.84 | 0.93 |
| 1,4-Dicaffeoylquinic acid | 50.00                       | 49.00      | 50.00  | 51.10  | 48.92± 1.74  | 3.56 |
|                           | 100.00                      | 99.00      | 100.00 | 101.10 | 99.62± 1.01  | 1.02 |
|                           | 200.00                      | 197.00     | 200.00 | 201.10 | 199.84± 1.68 | 0.84 |
| Luteolin                  | 50.00                       | 51.00      | 46.70  | 46.70  | 47.78± 1.86  | 3.90 |
|                           | 100.00                      | 100.00     | 98.45  | 98.45  | 98.98± 0.74  | 0.75 |
|                           | 200.00                      | 200.00     | 200.00 | 197.00 | 198.42± 1.51 | 0.76 |
| Kaempferol                | 50.00                       | 49.00      | 46.70  | 49.00  | 48.76± 1.25  | 2.56 |
|                           | 100.00                      | 98.00      | 98.45  | 99.00  | 98.37± 0.55  | 0.56 |
|                           | 200.00                      | 197.00     | 197.00 | 197.00 | 197.22± 0.49 | 0.25 |
| Ferulic acid              | 50.00                       | 49.00      | 49.00  | 50.00  | 48.62± 1.13  | 2.32 |
|                           | 100.00                      | 99.00      | 99.00  | 100.00 | 100.22± 1.34 | 1.34 |
|                           | 200.00                      | 197.00     | 199.00 | 200.10 | 200.64± 2.91 | 1.45 |
| Epicatechin               | 50.00                       | 51.00      | 49.00  | 50.10  | 49.84± 0.85  | 1.71 |
|                           | 100.00                      | 100.00     | 98.00  | 99.10  | 99.24± 0.86  | 0.86 |
|                           | 200.00                      | 200.00     | 197.00 | 198.10 | 198.84± 1.31 | 0.66 |
| Ellagic acid              | 50.00                       | 47.23      | 47.00  | 48.10  | 49.09± 2.32  | 4.72 |
|                           | 100.00                      | 99.32      | 101.00 | 102.10 | 100.70± 1.07 | 1.07 |
|                           | 200.00                      | 199.20     | 203.00 | 204.10 | 201.48± 2.04 | 1.01 |
| Kaempferol-3-O-glucoside  | 50.00                       | 49.00      | 49.00  | 50.10  | 49.66± 0.72  | 1.45 |
|                           | 100.00                      | 98.22      | 99.00  | 100.10 | 99.33± 0.83  | 0.84 |
|                           | 200.00                      | 198.33     | 199.00 | 199.00 | 199.00± 0.56 | 0.28 |
| Quercetin                 | 50.00                       | 49.00      | 51.00  | 49.00  | 49.89± 0.95  | 1.91 |
|                           | 100.00                      | 99.00      | 100.00 | 97.65  | 99.10± 0.97  | 0.98 |
|                           | 200.00                      | 197.67     | 200.00 | 199.00 | 199.11± 0.96 | 0.48 |
| Apigenin                  | 50.00                       | 49.40      | 49.56  | 48.00  | 49.21± 0.78  | 1.59 |
|                           | 100.00                      | 99.33      | 101.00 | 98.50  | 99.83± 1.03  | 1.03 |
|                           | 200.00                      | 199.00     | 203.00 | 197.60 | 200.09± 2.04 | 1.02 |

All values are mean  $\pm$  S.D. taken as triplicates. All values are mean  $\pm$  S.D. triplicate analyses for 3 days. Percent relative of SD variation (% RSD);  $(SD/Mean) \times 100$ .

**Table S3.** Gastrointestinal and respiratory pathogenic genes of the extract.

| # | Symbol | Description                            | Type    | Matched Phenotypes                                                             | Matched Phenotypes Count | Score | - Log10(p) | Average Disease Causing Likelihood |
|---|--------|----------------------------------------|---------|--------------------------------------------------------------------------------|--------------------------|-------|------------|------------------------------------|
| 1 | ADRB2  | Adrenoceptor Beta 2                    | Protein | asthma; coughing; wheezing; diarrhea; constipation; "irritable bowel syndrome" | 6                        | 80.37 | 3.93       | 41                                 |
| 2 | SLC6A4 | Solute Carrier Family 6 Member 4       | Protein | asthma; coughing; wheezing; diarrhea; constipation; "irritable bowel syndrome" | 6                        | 56.77 | 3.29       | 73                                 |
| 3 | CFTR   | CF Transmembrane Conductance Regulator | Protein | asthma; coughing; wheezing; diarrhea; constipation; "irritable bowel syndrome" | 6                        | 48.87 | 2.99       | 17.2                               |
| 4 | MPO    | Myeloperoxidase                        | Protein | asthma; coughing; wheezing; diarrhea; constipation; "irritable bowel syndrome" | 6                        | 36.21 | 2.66       | 33.8                               |
| 5 | PTGER2 | Prostaglandin E Receptor 2             | Protein | asthma; coughing; wheezing; diarrhea; constipation                             | 5                        | 34.51 | 2.71       | 77.4                               |
| 6 | MYLK   | Myosin Light Chain Kinase              | Protein | asthma; coughing; wheezing; diarrhea; constipation; "irritable bowel syndrome" | 6                        | 32.56 | 2.62       | 22.6                               |
| 7 | COMT   | Catechol-O-Methyltransferase           | Protein | asthma; coughing; wheezing; diarrhea; constipation; "irritable bowel syndrome" | 6                        | 32.47 | 2.61       | 11.8                               |
| 8 | EGFR   | Epidermal Growth Factor Receptor       | Protein | asthma; coughing; wheezing; diarrhea; constipation; "irritable bowel syndrome" | 6                        | 30.35 | 2.53       | 77.6                               |

|    |        |                                                                        |         |                                                                                |   |       |      |      |
|----|--------|------------------------------------------------------------------------|---------|--------------------------------------------------------------------------------|---|-------|------|------|
| 9  | NOS2   | Nitric Oxide Synthase 2                                                | Protein | asthma; coughing; wheezing; diarrhea; constipation; "irritable bowel syndrome" | 6 | 28.35 | 2.44 | 46.6 |
| 10 | MMP9   | Matrix Metalloproteinase 9                                             | Protein | asthma; coughing; wheezing; diarrhea; constipation; "irritable bowel syndrome" | 6 | 24.8  | 2.28 | 20.3 |
| 11 | ELANE  | Elastase, Neutrophil Expressed                                         | Protein | asthma; coughing; wheezing; diarrhea; constipation; "irritable bowel syndrome" | 6 | 24.61 | 2.27 | 51.2 |
| 12 | MMP1   | Matrix Metalloproteinase 1                                             | Protein | asthma; coughing; wheezing; diarrhea; constipation                             | 5 | 23.7  | 2.34 | 34.2 |
| 13 | PPARG  | Peroxisome Proliferator Activated Receptor Gamma                       | Protein | asthma; coughing; wheezing; diarrhea; constipation; "irritable bowel syndrome" | 6 | 21.39 | 2.21 | 58.4 |
| 14 | AKT1   | AKT Serine/Threonine Kinase 1                                          | Protein | asthma; coughing; wheezing; diarrhea; constipation; "irritable bowel syndrome" | 6 | 21.07 | 2.19 | 90.8 |
| 15 | PIK3CA | Phosphatidylinositol-4,5-Bisphosphate 3-Kinase Catalytic Subunit Alpha | Protein | asthma; coughing; wheezing; diarrhea; constipation                             | 5 | 18    | 2.14 | 64.4 |
| 16 | MAPK14 | Mitogen-Activated Protein Kinase 14                                    | Protein | asthma; coughing; wheezing; diarrhea; constipation; "irritable bowel syndrome" | 6 | 15.45 | 1.91 | 60.3 |
| 17 | MAPK3  | Mitogen-Activated Protein Kinase 3                                     | Protein | asthma; coughing; wheezing; diarrhea; constipation                             | 5 | 15.07 | 1.98 | 84.7 |
| 18 | CTNNB1 | Catenin Beta 1                                                         | Protein | asthma; coughing; wheezing; diarrhea; constipation; "irritable bowel syndrome" | 6 | 15.02 | 1.89 | 91.9 |
| 19 | MMP12  | Matrix Metalloproteinase 12                                            | Protein | asthma; coughing; wheezing; diarrhea; constipation                             | 5 | 14.75 | 1.96 | ND   |

|    |         |                                                                        |         |                                                                                |   |       |      |      |
|----|---------|------------------------------------------------------------------------|---------|--------------------------------------------------------------------------------|---|-------|------|------|
| 20 | MMP2    | Matrix Metalloproteinase 2                                             | Protein | asthma; coughing; wheezing; diarrhea; constipation                             | 5 | 14.69 | 1.95 | 71.8 |
| 21 | AGTR1   | Angiotensin II Receptor Type 1                                         | Protein | asthma; coughing; wheezing; diarrhea; constipation                             | 5 | 14.52 | 1.94 | 63.8 |
| 22 | ADORA1  | Adenosine A1 Receptor                                                  | Protein | asthma; coughing; wheezing; diarrhea; constipation                             | 5 | 13.8  | 1.9  | 79   |
| 23 | PIK3CG  | Phosphatidylinositol-4,5-Bisphosphate 3-Kinase Catalytic Subunit Gamma | Protein | asthma; coughing; wheezing; diarrhea; constipation                             | 5 | 12.74 | 1.81 | 53.7 |
| 24 | CXCR1   | C-X-C Motif Chemokine Receptor 1                                       | Protein | asthma; coughing; wheezing; diarrhea; constipation                             | 5 | 12.63 | 1.8  | 21.2 |
| 25 | SRC     | SRC Proto-Oncogene, Non-Receptor Tyrosine Kinase                       | Protein | asthma; coughing; wheezing; diarrhea; constipation                             | 5 | 11.05 | 1.71 | 92   |
| 26 | CACNA1A | Calcium Voltage-Gated Channel Subunit Alpha1 A                         | Protein | coughing; diarrhea; constipation; "irritable bowel syndrome"                   | 4 | 8.07  | 1.59 | 51.4 |
| 27 | PRKCA   | Protein Kinase C Alpha                                                 | Protein | asthma; coughing; wheezing; diarrhea; constipation                             | 5 | 8.05  | 1.52 | 89.4 |
| 28 | PRKG1   | Protein Kinase CGMP-Dependent 1                                        | Protein | asthma; coughing; wheezing; diarrhea                                           | 4 | 7.63  | 1.56 | 66.6 |
| 29 | HMGCR   | 3-Hydroxy-3-Methylglutaryl-CoA Reductase                               | Protein | asthma; coughing; wheezing; diarrhea; constipation; "irritable bowel syndrome" | 6 | 6.7   | 1.39 | 83.1 |
| 30 | ACHE    | Acetylcholinesterase (Cartwright Blood Group)                          | Protein | asthma; coughing; wheezing; diarrhea; constipation                             | 5 | 6.57  | 1.43 | 43.9 |
| 31 | ACTA2   | Actin Alpha 2, Smooth Muscle                                           | Protein | asthma; coughing; wheezing; constipation                                       | 4 | 6.43  | 1.47 | 82.6 |
| 32 | NFE2L2  | Nuclear Factor, Erythroid 2 Like 2                                     | Protein | asthma; coughing; wheezing; diarrhea; constipation                             | 5 | 6.26  | 1.4  | 54.7 |
| 33 | MAOA    | Monoamine Oxidase A                                                    | Protein | asthma; coughing; diarrhea; constipation                                       | 4 | 6.08  | 1.45 | 84.1 |



|        |         |                                                  |         |                                                            |   |      |      |      |
|--------|---------|--------------------------------------------------|---------|------------------------------------------------------------|---|------|------|------|
| 3<br>4 | INPP5E  | Inositol Polyphosphate-5-Phosphatase E           | Protein | coughing; wheezing; constipation                           | 3 | 5.77 | 1.49 | 51.2 |
| 3<br>5 | EDNRA   | Endothelin Receptor Type A                       | Protein | asthma; coughing; diarrhea; constipation                   | 4 | 4.65 | 1.31 | 84.7 |
| 3<br>6 | PTK2    | Protein Tyrosine Kinase 2                        | Protein | asthma; coughing; wheezing; diarrhea; constipation         | 5 | 4.17 | 1.23 | 83   |
| 3<br>7 | CHRM2   | Cholinergic Receptor Muscarinic 2                | Protein | asthma; coughing; constipation                             | 3 | 2.86 | 1.19 | 63.1 |
| 3<br>8 | PRKCB   | Protein Kinase C Beta                            | Protein | asthma; coughing; wheezing; diarrhea; constipation         | 5 | 2.82 | 1.09 | 87.4 |
| 3<br>9 | PLCG1   | Phospholipase C Gamma 1                          | Protein | asthma; coughing; wheezing; diarrhea; constipation         | 5 | 2.71 | 1.07 | 65.3 |
| 4<br>0 | MAOB    | Monoamine Oxidase B                              | Protein | asthma; coughing; diarrhea; constipation                   | 4 | 2.66 | 1.11 | 84.5 |
| 4<br>1 | PRKCD   | Protein Kinase C Delta                           | Protein | asthma; coughing; diarrhea; constipation                   | 4 | 2.51 | 1.08 | 81.3 |
| 4<br>2 | CHRM1   | Cholinergic Receptor Muscarinic 1                | Protein | asthma; coughing; wheezing; constipation                   | 4 | 2.39 | 1.07 | 87.1 |
| 4<br>3 | CACNA1C | Calcium Voltage-Gated Channel Subunit Alpha1 C   | Protein | asthma; coughing; diarrhea; constipation                   | 4 | 2.16 | 1.03 | 70.8 |
| 4<br>4 | CYP17A1 | Cytochrome P450 Family 17 Subfamily A Member 1   | Protein | asthma; coughing; diarrhea; constipation                   | 4 | 1.85 | 0.98 | 90.8 |
| 4<br>5 | CSNK2A1 | Casein Kinase 2 Alpha 1                          | Protein | diarrhea; constipation                                     | 2 | 1.81 | 1.09 | 83.5 |
| 4<br>6 | GSK3B   | Glycogen Synthase Kinase 3 Beta                  | Protein | asthma; diarrhea; constipation                             | 3 | 1.79 | 1.01 | 83.2 |
| 4<br>7 | PPARD   | Peroxisome Proliferator Activated Receptor Delta | Protein | asthma; diarrhea; constipation; "irritable bowel syndrome" | 4 | 1.47 | 0.9  | 93.3 |
| 4<br>8 | PLCE1   | Phospholipase C Epsilon 1                        | Protein | coughing; diarrhea; constipation                           | 3 | 1.01 | 0.82 | 47.3 |

|    |         |                                                       |         |                                |   |      |      |      |
|----|---------|-------------------------------------------------------|---------|--------------------------------|---|------|------|------|
| 49 | KDM5C   | Lysine Demethylase 5C                                 | Protein | asthma; coughing; constipation | 3 | 0.99 | 0.81 | 93   |
| 50 | MYL9    | Myosin Light Chain 9                                  | Protein | asthma; diarrhea; constipation | 3 | 0.99 | 0.81 | 79.5 |
| 51 | ADRA1A  | Adrenoceptor Alpha 1A                                 | Protein | asthma; coughing               | 2 | 0.83 | 0.82 | 51   |
| 52 | CACNA1D | Calcium Voltage-Gated Channel Subunit Alpha1 D        | Protein | coughing; constipation         | 2 | 0.82 | 0.82 | 64.4 |
| 53 | CAMK2B  | Calcium/Calmodulin Dependent Protein Kinase II Beta   | Protein | constipation                   | 1 | 0.81 | 0.94 | 50.7 |
| 54 | ITPR1   | Inositol 1,4,5-Trisphosphate Receptor Type 1          | Protein | asthma                         | 1 | 0.38 | 0.68 | 73.5 |
| 55 | HSD11B1 | Hydroxysteroid 11-Beta Dehydrogenase 1                | Protein | asthma                         | 1 | 0.29 | 0.6  | 87.8 |
| 56 | CAMK2A  | Calcium/Calmodulin Dependent Protein Kinase II Alpha  | Protein | constipation                   | 1 | 0.13 | 0.34 | 91.8 |
| 57 | PRKACA  | Protein Kinase CAMP-Activated Catalytic Subunit Alpha | Protein | coughing                       | 1 | 0.11 | 0.33 | 88.8 |

**Table S4.** Top 15 GO Biological process of bioactive compounds of an hydroethanolic extract of *C. sativus* for gastrointestinal and respiratory target genes.

| ID         | Description                                                | pvalue                | p.adjust           | qvalue             | geneID                                                                                                                    |
|------------|------------------------------------------------------------|-----------------------|--------------------|--------------------|---------------------------------------------------------------------------------------------------------------------------|
| GO:0050804 | modulation of chemical synaptic transmission               | 0.00000000<br>0000089 | 0.000000<br>000077 | 0.000000<br>000038 | EGFR, ACHE, SLC6A4, CHRM2, PRKCB, GSK3B, SRC, ADORA1, CAMK2B, ADRA1A, ADRB2, CACNA1D, CAMK2A, PLCG1, CACNA1A, PRKACA      |
| GO:0099177 | regulation of trans-synaptic signaling                     | 0.00000000<br>0000092 | 0.000000<br>000077 | 0.000000<br>000038 | EGFR, ACHE, SLC6A4, CHRM2, PRKCB, GSK3B, SRC, ADORA1, CAMK2B, ADRA1A, ADRB2, CACNA1D, CAMK2A, PLCG1, CACNA1A, PRKACA      |
| GO:0006874 | cellular calcium ion homeostasis                           | 0.00000000<br>0000095 | 0.000000<br>000077 | 0.000000<br>000038 | PTGER2, PRKCB, ADORA1, CXCR1, PIK3CG, AGTR1, CACNA1C, EDNRA, ADRA1A, ELANE, CACNA1D, PLCE1, PLCG1, ITPR1, CACNA1A, PRKACA |
| GO:0003012 | muscle system process                                      | 0.00000000<br>0000137 | 0.000000<br>000077 | 0.000000<br>000038 | CHRM2, PTK2, ADORA1, CAMK2B, MYLK, PIK3CG, CACNA1C, EDNRA, ADRA1A, MYL9, ADRB2, CACNA1D, PRKCA, PIK3CA, PLCE1, PRKACA     |
| GO:0055074 | calcium ion homeostasis                                    | 0.00000000<br>0000142 | 0.000000<br>000077 | 0.000000<br>000038 | PTGER2, PRKCB, ADORA1, CXCR1, PIK3CG, AGTR1, CACNA1C, EDNRA, ADRA1A, ELANE, CACNA1D, PLCE1, PLCG1, ITPR1, CACNA1A, PRKACA |
| GO:0072503 | cellular divalent inorganic cation homeostasis             | 0.00000000<br>0000305 | 0.000000<br>000138 | 0.000000<br>000067 | PTGER2, PRKCB, ADORA1, CXCR1, PIK3CG, AGTR1, CACNA1C, EDNRA, ADRA1A, ELANE, CACNA1D, PLCE1, PLCG1, ITPR1, CACNA1A, PRKACA |
| GO:0051480 | regulation of cytosolic calcium ion concentration          | 0.00000000<br>0000959 | 0.000000<br>000372 | 0.000000<br>000182 | PTGER2, ADORA1, CXCR1, PIK3CG, AGTR1, CACNA1C, EDNRA, ADRA1A, CACNA1D, PLCE1, PLCG1, ITPR1, CACNA1A, PRKACA               |
| GO:0018105 | peptidyl-serine phosphorylation                            | 0.00000000<br>0003001 | 0.000000<br>001019 | 0.000000<br>000498 | EGFR, PRKCD, PRKCB, GSK3B, SRC, CSNK2A1, AKT1, MAPK3, MAPK14, PRKCA, PIK3CA, CAMK2A, PRKACA                               |
| GO:0001653 | cellular response to peptide                               | 0.00000000<br>0004155 | 0.000000<br>001254 | 0.000000<br>000613 | NFE2L2, PPARG, PRKCD, PRKCB, PTK2, GSK3B, SRC, AKT1, AGTR1, ADRB2, PIK3CA, CAMK2A, CACNA1A, PRKACA                        |
| GO:0007204 | positive regulation of cytosolic calcium ion concentration | 0.00000000<br>0004844 | 0.000000<br>001316 | 0.000000<br>000643 | PTGER2, CXCR1, PIK3CG, AGTR1, CACNA1C, EDNRA, ADRA1A, CACNA1D, PLCE1, PLCG1, ITPR1, CACNA1A, PRKACA                       |
| GO:0090257 | regulation of muscle system process                        | 0.00000000<br>0006234 | 0.000000<br>001540 | 0.000000<br>000752 | CHRM2, PTK2, ADORA1, CAMK2B, PIK3CG, CACNA1C, ADRA1A, MYL9, ADRB2, PRKCA, PLCE1, PRKACA                                   |
| GO:0018209 | peptidyl-serine modification                               | 0.00000000<br>0007390 | 0.000000<br>001673 | 0.000000<br>000817 | EGFR, PRKCD, PRKCB, GSK3B, SRC, CSNK2A1, AKT1, MAPK3, MAPK14, PRKCA, PIK3CA, CAMK2A, PRKACA                               |
| GO:0038127 | ERBB signaling pathway                                     | 0.00000000<br>0009425 | 0.000000<br>001970 | 0.000000<br>000962 | MMP9, EGFR, PTK2, SRC, ADORA1, AKT1, PRKCA, PIK3CA, PLCE1, PLCG1                                                          |
| GO:0006936 | muscle contraction                                         | 0.00000000<br>0021020 | 0.000000<br>004025 | 0.000000<br>001966 | CHRM2, ADORA1, MYLK, PIK3CG, CACNA1C, EDNRA, ADRA1A, MYL9, ADRB2, CACNA1D, PIK3CA, PLCE1, PRKACA                          |

|            |                     |                       |                    |                    |                                                                      |
|------------|---------------------|-----------------------|--------------------|--------------------|----------------------------------------------------------------------|
| GO:0030168 | platelet activation | 0.00000000<br>0022218 | 0.000000<br>004025 | 0.000000<br>001966 | PIK3R6, PRKCD, PRKCB, SRC, PIK3CG, MYL9, MAPK3, PRKCA, PIK3CA, ITPR1 |
|------------|---------------------|-----------------------|--------------------|--------------------|----------------------------------------------------------------------|

**Table S5:** Top 15 KEGG pathway of bioactive compounds of a hydroethanolic extract of *C. sativus* for gastrointestinal and respiratory target genes.

| ID       | Description                                      | pvalue               | p.adjust             | qvalue               | geneID                                                                                                                                            |
|----------|--------------------------------------------------|----------------------|----------------------|----------------------|---------------------------------------------------------------------------------------------------------------------------------------------------|
| hsa04725 | Cholinergic synapse                              | 0.000000<br>00000000 | 0.000000<br>00000000 | 0.000000<br>00000000 | CHRM1, PIK3R6, ACHE, CHRM2, PRKCB, CAMK2B, AKT1, PIK3CG, CACNA1C, CACNA1D, MAPK3, PRKCA, PIK3CA, CAMK2A, ITPR1, CACNA1A, PRKACA                   |
| hsa04020 | Calcium signaling pathway                        | 0.000000<br>00000000 | 0.000000<br>00000000 | 0.000000<br>00000000 | CHRM1, EGFR, NOS2, CHRM2, PRKCB, CAMK2B, MYLK, AGTR1, CACNA1C, EDNRA, ADRA1A, ADRB2, CACNA1D, PRKCA, CAMK2A, PLCE1, PLCG1, ITPR1, CACNA1A, PRKACA |
| hsa05205 | Proteoglycans in cancer                          | 0.000000<br>00000000 | 0.000000<br>00000002 | 0.000000<br>00000000 | MMP9, MMP2, EGFR, CTNNB1, PRKCB, PTK2, SRC, CAMK2B, AKT1, MAPK3, MAPK14, PRKCA, PIK3CA, CAMK2A, PLCE1, PLCG1, ITPR1, PRKACA                       |
| hsa04912 | GnRH signaling pathway                           | 0.000000<br>00000000 | 0.000000<br>00000002 | 0.000000<br>00000000 | MMP2, EGFR, PRKCD, PRKCB, SRC, CAMK2B, CACNA1C, CACNA1D, MAPK3, MAPK14, PRKCA, CAMK2A, ITPR1, PRKACA                                              |
| hsa04728 | Dopaminergic synapse                             | 0.000000<br>00000000 | 0.000000<br>00000010 | 0.000000<br>00000002 | MAOB, MAOA, PRKCB, GSK3B, COMT, CAMK2B, AKT1, CACNA1C, CACNA1D, MAPK14, PRKCA, CAMK2A, ITPR1, CACNA1A, PRKACA                                     |
| hsa04024 | cAMP signaling pathway                           | 0.000000<br>00000001 | 0.000000<br>00000044 | 0.000000<br>00000009 | CHRM1, CHRM2, PTGER2, ADORA1, CAMK2B, AKT1, CFTR, CACNA1C, EDNRA, MYL9, ADRB2, CACNA1D, MAPK3, PIK3CA, CAMK2A, PLCE1, PRKACA                      |
| hsa04921 | Oxytocin signaling pathway                       | 0.000000<br>00000003 | 0.000000<br>00000076 | 0.000000<br>00000016 | EGFR, PIK3R6, PRKCB, SRC, CAMK2B, MYLK, PIK3CG, CACNA1C, MYL9, CACNA1D, MAPK3, PRKCA, CAMK2A, ITPR1, PRKACA                                       |
| hsa04012 | ErbB signaling pathway                           | 0.000000<br>00000015 | 0.000000<br>00000387 | 0.000000<br>00000081 | EGFR, PRKCB, PTK2, GSK3B, SRC, CAMK2B, AKT1, MAPK3, PRKCA, PIK3CA, CAMK2A, PLCG1                                                                  |
| hsa05417 | Lipid and atherosclerosis                        | 0.000000<br>00000021 | 0.000000<br>00000494 | 0.000000<br>00000103 | MMP9, MMP1, NFE2L2, PPARG, PTK2, GSK3B, SRC, CAMK2B, AKT1, MAPK3, MAPK14, PRKCA, PIK3CA, CAMK2A, PLCG1, ITPR1                                     |
| hsa04261 | Adrenergic signaling in cardiomyocytes           | 0.000000<br>00000039 | 0.000000<br>00000731 | 0.000000<br>00000152 | PIK3R6, CAMK2B, AKT1, PIK3CG, AGTR1, CACNA1C, ADRA1A, ADRB2, CACNA1D, MAPK3, MAPK14, PRKCA, CAMK2A, PRKACA                                        |
| hsa04935 | Growth hormone synthesis, secretion and action   | 0.000000<br>00000039 | 0.000000<br>00000731 | 0.000000<br>00000152 | PRKCB, PTK2, GSK3B, AKT1, CACNA1C, CACNA1D, MAPK3, MAPK14, PRKCA, PIK3CA, PLCG1, ITPR1, PRKACA                                                    |
| hsa04750 | Inflammatory mediator regulation of TRP channels | 0.000000<br>00000087 | 0.000000<br>00001499 | 0.000000<br>00000313 | PTGER2, PRKCD, PRKCB, SRC, CAMK2B, MAPK14, PRKCA, PIK3CA, CAMK2A, PLCG1, ITPR1, PRKACA                                                            |
| hsa04270 | Vascular smooth muscle contraction               | 0.000000<br>00000166 | 0.000000<br>00002547 | 0.000000<br>00000531 | PRKCD, PRKCB, MYLK, AGTR1, CACNA1C, EDNRA, ADRA1A, MYL9, CACNA1D, MAPK3, PRKCA, ITPR1, PRKACA                                                     |
| hsa04022 | cGMP-PKG signaling pathway                       | 0.000000<br>00000172 | 0.000000<br>00002547 | 0.000000<br>00000531 | PIK3R6, ADORA1, AKT1, MYLK, PIK3CG, AGTR1, CACNA1C, EDNRA, ADRA1A, MYL9, ADRB2, CACNA1D, MAPK3, ITPR1                                             |

|          |                           |                      |                      |                      |                                                                               |
|----------|---------------------------|----------------------|----------------------|----------------------|-------------------------------------------------------------------------------|
| hsa04926 | Relaxin signaling pathway | 0.000000<br>00002417 | 0.000000<br>00033353 | 0.000000<br>00006954 | MMP9, MMP1, MMP2, EGFR, NOS2, SRC, AKT1, MAPK3, MAPK14, PRKCA, PIK3CA, PRKACA |
|----------|---------------------------|----------------------|----------------------|----------------------|-------------------------------------------------------------------------------|

**Table S6.** Network analysis of pathogenic target genes interaction with phytoconstituents.

| Name                      | Betweenness Centrality | Closeness Centrality | Degree | Topological Coefficient | Type      |
|---------------------------|------------------------|----------------------|--------|-------------------------|-----------|
| Kaempferol                | 0.30                   | 0.50                 | 27     | 0.30                    | Compounds |
| Quercetin                 | 0.15                   | 0.46                 | 21     | 0.37                    | Compounds |
| Apigenin                  | 0.09                   | 0.43                 | 17     | 0.42                    | Compounds |
| Luteolin                  | 0.06                   | 0.43                 | 17     | 0.45                    | Compounds |
| Sitosterol                | 0.18                   | 0.42                 | 14     | 0.20                    | Compounds |
| Kaempferol 3-O-glucoside  | 0.11                   | 0.41                 | 13     | 0.31                    | Compounds |
| Ellagic acid              | 0.06                   | 0.41                 | 12     | 0.41                    | Compounds |
| Stigmasterol              | 0.09                   | 0.40                 | 11     | 0.22                    | Compounds |
| Ferulic acid              | 0.12                   | 0.40                 | 10     | 0.30                    | Compounds |
| Scopoletin                | 0.07                   | 0.39                 | 10     | 0.42                    | Compounds |
| ACHE                      | 0.19                   | 0.50                 | 9      | 0.30                    | Genes     |
| 1,4-Dicaffeoylquinic acid | 0.07                   | 0.38                 | 8      | 0.33                    | Compounds |
| MMP9                      | 0.05                   | 0.45                 | 7      | 0.34                    | Genes     |
| MMP2                      | 0.05                   | 0.45                 | 7      | 0.34                    | Genes     |
| EGFR                      | 0.04                   | 0.43                 | 7      | 0.37                    | Genes     |
| MAOA                      | 0.04                   | 0.43                 | 7      | 0.37                    | Genes     |
| PTK2                      | 0.01                   | 0.40                 | 6      | 0.45                    | Genes     |
| GSK3B                     | 0.01                   | 0.40                 | 6      | 0.45                    | Genes     |
| SRC                       | 0.01                   | 0.40                 | 6      | 0.45                    | Genes     |
| ADORA1                    | 0.01                   | 0.39                 | 5      | 0.50                    | Genes     |
| CSNK2A1                   | 0.01                   | 0.38                 | 5      | 0.52                    | Genes     |
| MMP12                     | 0.02                   | 0.40                 | 5      | 0.46                    | Genes     |
| CACNA1D                   | 0.05                   | 0.42                 | 5      | 0.37                    | Genes     |
| PRKCD                     | 0.02                   | 0.35                 | 4      | 0.40                    | Genes     |
| PRKCB                     | 0.02                   | 0.35                 | 4      | 0.40                    | Genes     |
| MPO                       | 0.00                   | 0.37                 | 4      | 0.61                    | Genes     |
| CXCR1                     | 0.00                   | 0.37                 | 4      | 0.61                    | Genes     |
| CAMK2B                    | 0.00                   | 0.37                 | 4      | 0.61                    | Genes     |
| AKT1                      | 0.00                   | 0.37                 | 4      | 0.55                    | Genes     |
| HSD11B1                   | 0.01                   | 0.32                 | 3      | 0.51                    | Genes     |
| NOS2                      | 0.01                   | 0.32                 | 3      | 0.51                    | Genes     |
| MYLK                      | 0.01                   | 0.38                 | 3      | 0.55                    | Genes     |
| CFTR                      | 0.00                   | 0.35                 | 3      | 0.69                    | Genes     |
| MAOB                      | 0.00                   | 0.31                 | 2      | 0.56                    | Genes     |
| MMP1                      | 0.00                   | 0.30                 | 2      | 0.57                    | Genes     |
| CHRM1                     | 0.00                   | 0.32                 | 2      | 0.66                    | Genes     |
| PIK3R6                    | 0.00                   | 0.31                 | 2      | 0.50                    | Genes     |
| CYP17A1                   | 0.00                   | 0.30                 | 2      | 0.88                    | Genes     |
| SLC6A4                    | 0.00                   | 0.30                 | 2      | 0.88                    | Genes     |

|         |      |      |   |      |       |
|---------|------|------|---|------|-------|
| CHRM2   | 0.00 | 0.30 | 2 | 0.88 | Genes |
| PTGER2  | 0.00 | 0.30 | 2 | 0.88 | Genes |
| PPARD   | 0.00 | 0.30 | 2 | 0.88 | Genes |
| PPARG   | 0.00 | 0.30 | 2 | 0.88 | Genes |
| PIK3CG  | 0.00 | 0.34 | 2 | 0.59 | Genes |
| ADRA1A  | 0.00 | 0.35 | 2 | 0.66 | Genes |
| PRKCA   | 0.00 | 0.36 | 2 | 0.61 | Genes |
| CAMK2A  | 0.00 | 0.36 | 2 | 0.61 | Genes |
| ITPR1   | 0.00 | 0.32 | 2 | 0.66 | Genes |
| CACNA1A | 0.00 | 0.32 | 2 | 0.82 | Genes |
| PRKACA  | 0.00 | 0.32 | 2 | 0.55 | Genes |
| NFE2L2  | 0.00 | 0.28 | 1 | 0.00 | Genes |
| CTNNB1  | 0.00 | 0.28 | 1 | 0.00 | Genes |
| COMT    | 0.00 | 0.28 | 1 | 0.00 | Genes |
| AGTR1   | 0.00 | 0.32 | 1 | 0.00 | Genes |
| CACNA1C | 0.00 | 0.34 | 1 | 0.00 | Genes |
| EDNRA   | 0.00 | 0.34 | 1 | 0.00 | Genes |
| MYL9    | 0.00 | 0.34 | 1 | 0.00 | Genes |
| ADRB2   | 0.00 | 0.34 | 1 | 0.00 | Genes |
| INPP5E  | 0.00 | 0.30 | 1 | 0.00 | Genes |
| ELANE   | 0.00 | 0.27 | 1 | 0.00 | Genes |
| MAPK3   | 0.00 | 0.29 | 1 | 0.00 | Genes |
| MAPK14  | 0.00 | 0.29 | 1 | 0.00 | Genes |
| PIK3CA  | 0.00 | 0.29 | 1 | 0.00 | Genes |
| PLCE1   | 0.00 | 0.34 | 1 | 0.00 | Genes |
| PLCG1   | 0.00 | 0.34 | 1 | 0.00 | Genes |



**Table S7.** Network analysis of pathogenic target genes ginteraction with phytoconstituents and GO biological process (BP).

| Name                                              | Betweenness Centrality | Closeness Centrality | Degree | Topological Coefficient | Type      |
|---------------------------------------------------|------------------------|----------------------|--------|-------------------------|-----------|
| Kaempferol                                        | 0.09                   | 0.52                 | 123    | 0.33                    | Compounds |
| ADORA1                                            | 0.03                   | 0.48                 | 100    | 0.41                    | Genes     |
| CACNA1D                                           | 0.04                   | 0.50                 | 90     | 0.36                    | Genes     |
| SRC                                               | 0.03                   | 0.48                 | 84     | 0.34                    | Genes     |
| Quercetin                                         | 0.05                   | 0.47                 | 80     | 0.34                    | Compounds |
| Kaempferol 3-O-glucoside                          | 0.03                   | 0.45                 | 77     | 0.37                    | Compounds |
| PRKCB                                             | 0.05                   | 0.50                 | 72     | 0.31                    | Genes     |
| EGFR                                              | 0.04                   | 0.47                 | 70     | 0.33                    | Genes     |
| Ellagic acid                                      | 0.03                   | 0.44                 | 62     | 0.38                    | Compounds |
| Regulation of trans-synaptic signaling            | 0.04                   | 0.47                 | 60     | 0.38                    | BP        |
| GSK3B                                             | 0.02                   | 0.47                 | 60     | 0.35                    | Genes     |
| Modulation of chemical synaptic transmission      | 0.04                   | 0.47                 | 60     | 0.38                    | BP        |
| Luteolin                                          | 0.02                   | 0.45                 | 58     | 0.38                    | Compounds |
| Apigenin                                          | 0.02                   | 0.44                 | 53     | 0.37                    | Compounds |
| PRKACA                                            | 0.05                   | 0.52                 | 52     | 0.34                    | Genes     |
| PTK2                                              | 0.02                   | 0.44                 | 48     | 0.36                    | Genes     |
| Peptidyl-serine modification                      | 0.04                   | 0.45                 | 45     | 0.32                    | BP        |
| Peptidyl-serine phosphorylation                   | 0.04                   | 0.45                 | 45     | 0.32                    | BP        |
| Sitosterol                                        | 0.03                   | 0.42                 | 42     | 0.28                    | Compounds |
| Cellular response to peptide                      | 0.07                   | 0.46                 | 42     | 0.31                    | BP        |
| ERBB signaling pathway                            | 0.02                   | 0.42                 | 40     | 0.40                    | BP        |
| CXCR1                                             | 0.01                   | 0.42                 | 40     | 0.49                    | Genes     |
| ADRA1A                                            | 0.02                   | 0.46                 | 40     | 0.43                    | Genes     |
| Muscle system process                             | 0.04                   | 0.46                 | 39     | 0.37                    | BP        |
| Cellular divalent inorganic cation homeostasis    | 0.04                   | 0.47                 | 36     | 0.38                    | BP        |
| Calcium ion homeostasis                           | 0.04                   | 0.47                 | 36     | 0.38                    | BP        |
| PIK3CG                                            | 0.02                   | 0.46                 | 36     | 0.38                    | Genes     |
| Cellular calcium ion homeostasis                  | 0.04                   | 0.47                 | 36     | 0.38                    | BP        |
| ACHE                                              | 0.03                   | 0.47                 | 36     | 0.32                    | Genes     |
| AKT1                                              | 0.01                   | 0.44                 | 32     | 0.38                    | Genes     |
| PRKCD                                             | 0.02                   | 0.42                 | 32     | 0.31                    | Genes     |
| CACNA1A                                           | 0.02                   | 0.44                 | 32     | 0.42                    | Genes     |
| CAMK2B                                            | 0.01                   | 0.42                 | 32     | 0.47                    | Genes     |
| Cegulation of cytosolic calcium ion concentration | 0.02                   | 0.45                 | 31     | 0.40                    | BP        |
| Scopoletin                                        | 0.00                   | 0.40                 | 29     | 0.43                    | Compounds |

|                                                            |      |      |    |      |           |
|------------------------------------------------------------|------|------|----|------|-----------|
| Regulation of muscle system process                        | 0.02 | 0.44 | 29 | 0.38 | BP        |
| Stigmasterol                                               | 0.01 | 0.41 | 28 | 0.29 | Compounds |
| Muscle contraction                                         | 0.02 | 0.44 | 27 | 0.40 | BP        |
| Positive regulation of cytosolic calcium ion concentration | 0.02 | 0.44 | 26 | 0.39 | BP        |
| Platelet activation                                        | 0.03 | 0.43 | 25 | 0.30 | BP        |
| PRKCA                                                      | 0.01 | 0.42 | 24 | 0.40 | Genes     |
| ITPR1                                                      | 0.01 | 0.42 | 24 | 0.40 | Genes     |
| CSNK2A1                                                    | 0.01 | 0.42 | 20 | 0.41 | Genes     |
| PTGER2                                                     | 0.01 | 0.37 | 20 | 0.55 | Genes     |
| CAMK2A                                                     | 0.01 | 0.43 | 20 | 0.42 | Genes     |
| CHRM2                                                      | 0.01 | 0.41 | 20 | 0.41 | Genes     |
| 1,4-Dicaffeoylquinic acid                                  | 0.01 | 0.38 | 18 | 0.33 | Compounds |
| PLCE1                                                      | 0.01 | 0.43 | 18 | 0.45 | Genes     |
| CACNA1C                                                    | 0.01 | 0.43 | 16 | 0.46 | Genes     |
| PLCG1                                                      | 0.01 | 0.43 | 16 | 0.45 | Genes     |
| MMP9                                                       | 0.02 | 0.43 | 14 | 0.32 | Genes     |
| PIK3CA                                                     | 0.01 | 0.44 | 14 | 0.34 | Genes     |
| EDNRA                                                      | 0.01 | 0.42 | 14 | 0.48 | Genes     |
| MYLK                                                       | 0.00 | 0.40 | 12 | 0.49 | Genes     |
| AGTR1                                                      | 0.01 | 0.42 | 12 | 0.45 | Genes     |
| ADRB2                                                      | 0.01 | 0.42 | 12 | 0.46 | Genes     |
| MYL9                                                       | 0.00 | 0.40 | 8  | 0.45 | Genes     |
| SLC6A4                                                     | 0.00 | 0.35 | 8  | 0.56 | Genes     |
| Ferulic acid                                               | 0.00 | 0.35 | 7  | 0.45 | Compounds |
| MAPK3                                                      | 0.00 | 0.36 | 6  | 0.48 | Genes     |
| ELANE                                                      | 0.00 | 0.34 | 6  | 0.68 | Genes     |
| PIK3R6                                                     | 0.00 | 0.35 | 4  | 0.38 | Genes     |
| PPARG                                                      | 0.00 | 0.35 | 4  | 0.47 | Genes     |
| MAPK14                                                     | 0.00 | 0.34 | 4  | 0.61 | Genes     |
| NFE2L2                                                     | 0.00 | 0.33 | 2  | 0.50 | Genes     |

**Table S8.** Network analysis of pathogenic target genes interaction with phytoconstituents and KEGG pathway.

| Name                                           | Betweenness Centrality | Closeness Centrality | Degree | Topological Coefficient | Type      |
|------------------------------------------------|------------------------|----------------------|--------|-------------------------|-----------|
| Kaempferol                                     | 0.09                   | 0.51                 | 126    | 0.34                    | Compounds |
| CACNA1D                                        | 0.03                   | 0.49                 | 100    | 0.35                    | Genes     |
| CAMK2B                                         | 0.03                   | 0.51                 | 88     | 0.34                    | Genes     |
| Kaempferol 3-O-glucoside                       | 0.02                   | 0.44                 | 84     | 0.38                    | Compounds |
| SRC                                            | 0.02                   | 0.49                 | 84     | 0.32                    | Genes     |
| EGFR                                           | 0.03                   | 0.49                 | 84     | 0.32                    | Genes     |
| Quercetin                                      | 0.04                   | 0.47                 | 81     | 0.34                    | Compounds |
| AKT1                                           | 0.03                   | 0.50                 | 80     | 0.34                    | Genes     |
| PRKCB                                          | 0.04                   | 0.49                 | 80     | 0.30                    | Genes     |
| Luteolin                                       | 0.02                   | 0.44                 | 63     | 0.39                    | Compounds |
| Ellagic acid                                   | 0.02                   | 0.43                 | 63     | 0.39                    | Compounds |
| Proteoglycans in cancer                        | 0.05                   | 0.47                 | 59     | 0.40                    | KEGG      |
| Sitosterol                                     | 0.02                   | 0.43                 | 52     | 0.30                    | Compounds |
| PRKCA                                          | 0.03                   | 0.51                 | 52     | 0.33                    | Genes     |
| Lipid and atherosclerosis                      | 0.06                   | 0.46                 | 48     | 0.36                    | KEGG      |
| GSK3B                                          | 0.01                   | 0.45                 | 48     | 0.35                    | Genes     |
| GnRH signaling pathway                         | 0.02                   | 0.45                 | 48     | 0.46                    | KEGG      |
| PTK2                                           | 0.01                   | 0.45                 | 48     | 0.35                    | Genes     |
| Calcium signaling pathway                      | 0.07                   | 0.49                 | 48     | 0.32                    | KEGG      |
| PRKACA                                         | 0.03                   | 0.49                 | 48     | 0.33                    | Genes     |
| Cholinergic synapse                            | 0.04                   | 0.46                 | 47     | 0.41                    | KEGG      |
| Apigenin                                       | 0.02                   | 0.43                 | 46     | 0.36                    | Compounds |
| Dopaminergic synapse                           | 0.05                   | 0.45                 | 45     | 0.39                    | KEGG      |
| ErbB signaling pathway                         | 0.01                   | 0.44                 | 44     | 0.45                    | KEGG      |
| Oxytocin signaling pathway                     | 0.03                   | 0.45                 | 44     | 0.42                    | KEGG      |
| ITPR1                                          | 0.03                   | 0.49                 | 44     | 0.33                    | Genes     |
| CAMK2A                                         | 0.02                   | 0.50                 | 44     | 0.35                    | Genes     |
| Relaxin signaling pathway                      | 0.02                   | 0.44                 | 43     | 0.39                    | KEGG      |
| MMP2                                           | 0.02                   | 0.45                 | 42     | 0.33                    | Genes     |
| MMP9                                           | 0.02                   | 0.46                 | 42     | 0.32                    | Genes     |
| Scopoletin                                     | 0.02                   | 0.42                 | 39     | 0.33                    | Compounds |
| cAMP signaling pathway                         | 0.05                   | 0.45                 | 38     | 0.34                    | KEGG      |
| Growth hormone synthesis, secretion and action | 0.02                   | 0.44                 | 36     | 0.45                    | KEGG      |

|                                                  |      |      |    |      |           |
|--------------------------------------------------|------|------|----|------|-----------|
| cGMP-PKG signaling pathway                       | 0.02 | 0.44 | 31 | 0.32 | KEGG      |
| Inflammatory mediator regulation of TRP channels | 0.02 | 0.43 | 31 | 0.42 | KEGG      |
| Adrenergic signaling in cardiomyocytes           | 0.02 | 0.43 | 30 | 0.43 | KEGG      |
| Vascular smooth muscle contraction               | 0.02 | 0.43 | 29 | 0.39 | KEGG      |
| 1,4-Dicaffeoylquinic acid                        | 0.01 | 0.40 | 25 | 0.33 | Compounds |
| PRKCD                                            | 0.01 | 0.39 | 24 | 0.32 | Genes     |
| MYLK                                             | 0.01 | 0.42 | 24 | 0.44 | Genes     |
| MAPK3                                            | 0.03 | 0.48 | 24 | 0.33 | Genes     |
| Stigmasterol                                     | 0.01 | 0.40 | 22 | 0.25 | Compounds |
| Ferulic acid                                     | 0.03 | 0.39 | 20 | 0.30 | Compounds |
| ADORA1                                           | 0.01 | 0.42 | 20 | 0.42 | Genes     |
| CACNA1C                                          | 0.01 | 0.46 | 20 | 0.38 | Genes     |
| ACHE                                             | 0.02 | 0.46 | 18 | 0.31 | Genes     |
| MAPK14                                           | 0.01 | 0.44 | 16 | 0.35 | Genes     |
| ADRA1A                                           | 0.00 | 0.41 | 16 | 0.42 | Genes     |
| PIK3CA                                           | 0.01 | 0.44 | 16 | 0.35 | Genes     |
| PIK3CG                                           | 0.00 | 0.40 | 16 | 0.44 | Genes     |
| PIK3R6                                           | 0.01 | 0.40 | 16 | 0.36 | Genes     |
| MAOA                                             | 0.01 | 0.43 | 14 | 0.34 | Genes     |
| PLCG1                                            | 0.01 | 0.44 | 12 | 0.39 | Genes     |
| NOS2                                             | 0.01 | 0.41 | 12 | 0.30 | Genes     |
| CACNA1A                                          | 0.00 | 0.41 | 12 | 0.42 | Genes     |
| CHRM2                                            | 0.01 | 0.39 | 12 | 0.41 | Genes     |
| CHRM1                                            | 0.00 | 0.42 | 12 | 0.41 | Genes     |
| MMP1                                             | 0.00 | 0.36 | 8  | 0.39 | Genes     |
| MYL9                                             | 0.00 | 0.40 | 8  | 0.45 | Genes     |
| PTGER2                                           | 0.00 | 0.36 | 8  | 0.40 | Genes     |
| ADRB2                                            | 0.00 | 0.41 | 8  | 0.46 | Genes     |
| EDNRA                                            | 0.00 | 0.41 | 8  | 0.46 | Genes     |
| AGTR1                                            | 0.00 | 0.40 | 8  | 0.43 | Genes     |
| CFTR                                             | 0.00 | 0.38 | 6  | 0.53 | Genes     |
| PLCE1                                            | 0.00 | 0.40 | 6  | 0.53 | Genes     |
| PPARG                                            | 0.00 | 0.35 | 4  | 0.45 | Genes     |
| MAOB                                             | 0.00 | 0.36 | 4  | 0.41 | Genes     |
| NFE2L2                                           | 0.00 | 0.34 | 2  | 0.55 | Genes     |
| COMT                                             | 0.00 | 0.33 | 2  | 0.61 | Genes     |
| CTNNB1                                           | 0.00 | 0.34 | 2  | 0.57 | Genes     |
